# Supplementary material
Source: publisher figshare collection journal article supplement (https://frontiersin.figshare.com/ndownloader/files/28188057)

## *Supplementary Material*

### **Timor collision front segmentation reveals potential for great earthquakes in the western Outer Banda Arc, Eastern Indonesia**

Aurélie Coudurier Curveur<sup>1</sup>, Satish C. Singh<sup>1</sup>, and Ian Deighton<sup>2</sup>

<sup>1</sup> Université de Paris, Institut de Physique du Globe de Paris, CNRS, F-75005 Paris, France

Now at : SNCF Réseau, DGII, VA OTH, 6 avenue François Mitterrand, 93210 Saint-Denis, France

<sup>2</sup> GPSI, TGS, Surbiton, United Kingdom

#### **1 Content of this file**

- References mentioned in the Supplementary Material
- Figure S1 and S2
- Table S1

#### **2 References**

[1] Keep, M., Clough, M., and L. Langhi. Neogene tectonic and structural evolution of the Timor Sea region, NW Australia. In M. Keep, & S. J. Moss (Eds.), *The Sedimentary Basins of Western Australia 3* (Perth, Australia ed., Vol. 1, pp. 342-353). Petroleum Exploration Society of Australia Limited (2002).

[2] Aurio Erdi, Benyamin Sapiie, Indra Gunawan, Novian Martha Kusuma & Alfend Rudyawan. New Perspective of Mesozoic Hydrocarbon Prospectivity Within West Timor, ASEG Extended Abstracts, 2018:1, 1-7 (2018), doi: 10.1071/ASEG2018abP031.

#### **3 Supplementary Figures**

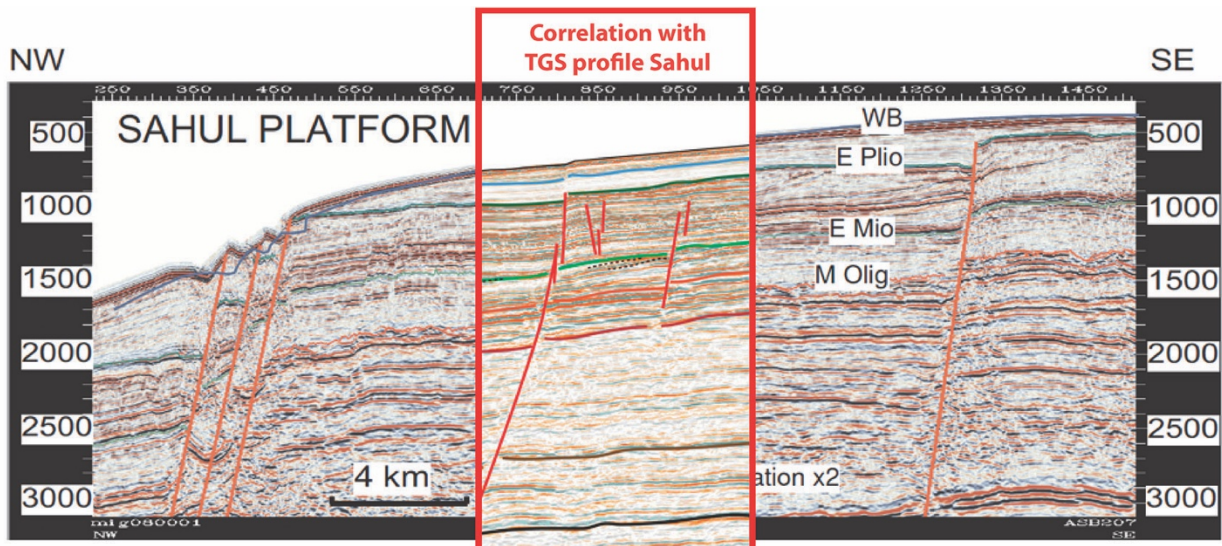

Figure 3: Structural style of the northern Sahul Platform area, showing the horizons mapped and the major faults. Note deformation between adjacent faults to the NW, suggesting a wrench component of movement. WB = water bottom; E Plio = Early Pliocene; E Mio = base Miocene; M Olig=Early Oligocene; Meso=top Mesozoic. Vertical scale is in milliseconds of two-way travel time.

**Figure S1:** Horizon correlation within the Australian NW shelf sedimentary section in the Sahul platform (i.e., corresponding to the Jamdena region) with seismic profile published by Keep et al. (2002) [1].

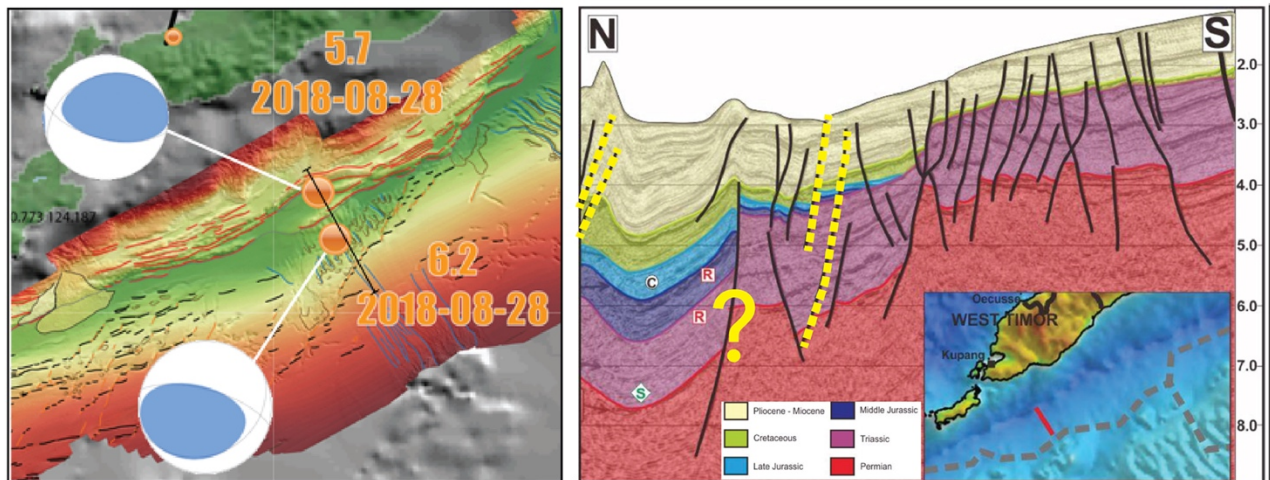

**Figure S2:** Left: Location of the  $M_w$  6.2 and  $M_w$  5.7, 2018 earthquakes offshore Timor. Focal mechanisms are from USGS. Black line indicates adjacent seismic profile. (Right) Interpreted seismic profile in time section (from Aurio et al., 2018) [2]. Dashed yellow lines highlight possible fault sources of the 2018 earthquakes located at the wedge front ( $M_w$  5.7) and within the incoming Australian northwest shelf sediments ( $M_w$  6.2).

**Table S1 : USGS focal mechanisms for the Mw6.2 and 5.7 earthquakes – Southwest Timor region.**

| USGS           |               |               |      |
|----------------|---------------|---------------|------|
| Time           | 28/8/18       | 7:08:11 (UTC) |      |
| Magnitude (Mw) | 6.2           |               |      |
| Latitude       | 10.773°S      |               |      |
| Longitude      | 124.187°E     |               |      |
| Depth          | 13.5 km       |               |      |
| Nodal planes   | Strike        | Dip           | Rake |
|                | 286°          | 68°           | 108° |
|                | 64°           | 28°           | 52°  |
| Moment         | 2.692e+18 N-m |               |      |

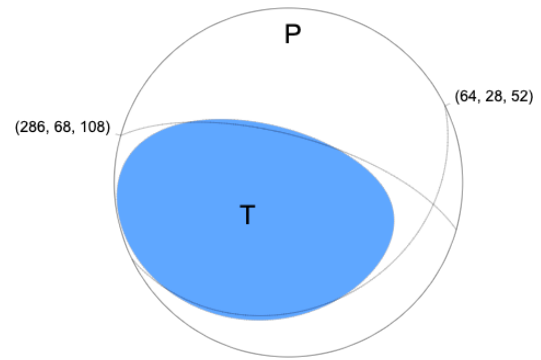

| USGS           |               |               |      |
|----------------|---------------|---------------|------|
| Time           | 28/8/18       | 7:13:32 (UTC) |      |
| Magnitude (Mw) | 5.71          |               |      |
| Latitude       | 10.631°S      |               |      |
| Longitude      | 124.136°E     |               |      |
| Depth          | 11.5 km       |               |      |
| Nodal planes   | Strike        | Dip           | Rake |
|                | 249°          | 33°           | 60°  |
|                | 104°          | 62°           | 108° |
| Moment         | 4.695e+17 N-m |               |      |

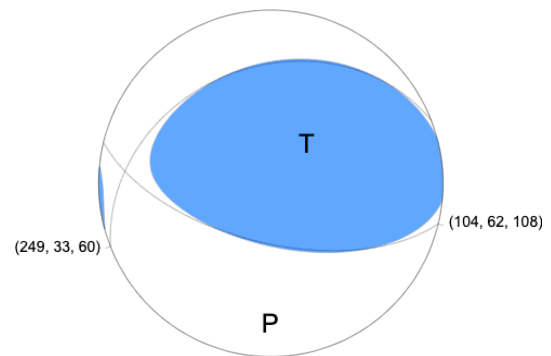

Supplement: Supplementary file 1 [file 28188057]
